**How would the HSPA framework play out in practice? 'Cross-sectoral collaboration (Governance)'**

*Dheepa Rajan*<sup>1</sup>

<sup>1</sup>WHO, Geneva, Switzerland

Contact: Rajand@who.int

The presentation will discuss housing as a social determinant of health. It will highlight how housing links to health system performance and thus demonstrate how contextual factors, usually placed outside the health system's boundaries, impact on intermediate outcomes and final goals.
